# Supplementary material for: Fluorinated graphdiyne as a significantly enhanced fluorescence material
Source: Royal Society of Chemistry journal article supplement (doi:10.1039/c9ra02272d), 2019-01-01
Supplement: c9ra02272d1.pdf [file c9ra02272d1.pdf]

## Supplementary Information

# Fluorinated graphdiyne as a significantly enhanced fluorescence material

Wenqing Xiao,<sup>a,b,c</sup> Huifang Kang,<sup>a,b,c</sup> Yuda Lin,<sup>a,b,c</sup> Mingxing Liang,<sup>a,b,c</sup> Jiaxin Li,<sup>a,b,c</sup> Feng  
Huang,<sup>a,b,c</sup> Qian Feng,<sup>a,b,c\*</sup> Yongping Zheng,<sup>a,b,c\*</sup> and Zhigao Huang<sup>a,b,c</sup>

<sup>a</sup> College of Physics and Energy, Fujian Normal University, Fujian Provincial Key Laboratory of Quantum Manipulation and New Energy Materials, Fuzhou, 350117, China.

<sup>b</sup> Fujian Provincial Collaborative Innovation Center for Optoelectronic Semiconductors and Efficient Devices, Xiamen, 361005, China

<sup>c</sup> Fujian Provincial Engineering Technology Research Center of Solar Energy Conversion and Energy Storage, Fuzhou, 350117, China

**\*Corresponding author:**

Telephone/Fax: 86-591-22867577.

E-mail: fengqian@fjnu.edu.cn, zyp@fjnu.edu.cn

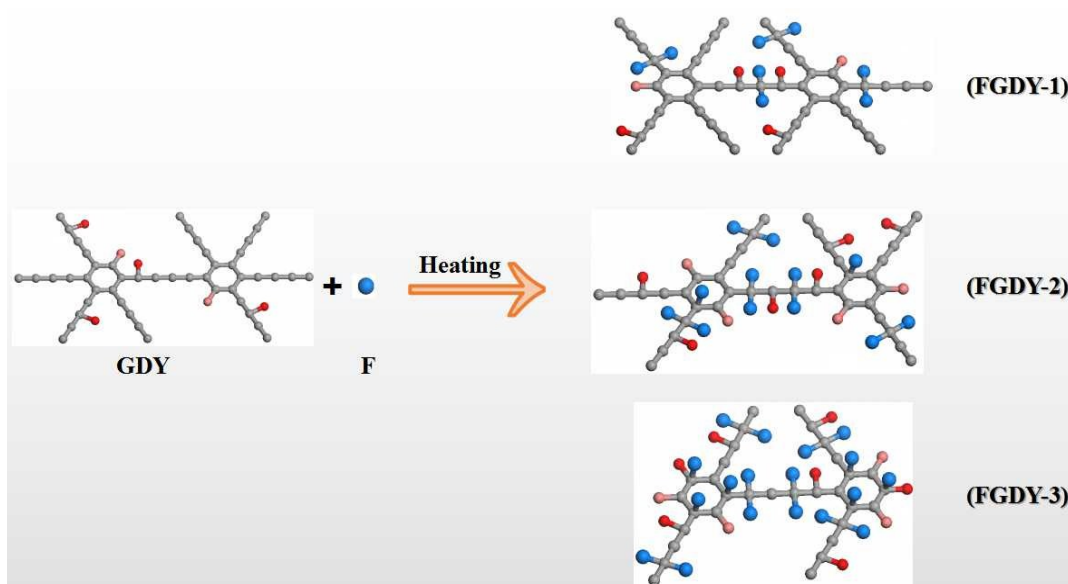

**Figure S1.** Schematic illustrations of F doping in GDY, in which gray balls represent C atom, blue balls represents F atoms, red balls represent O atoms in C-O bonds and pink balls represent O atoms in C=O bonds.

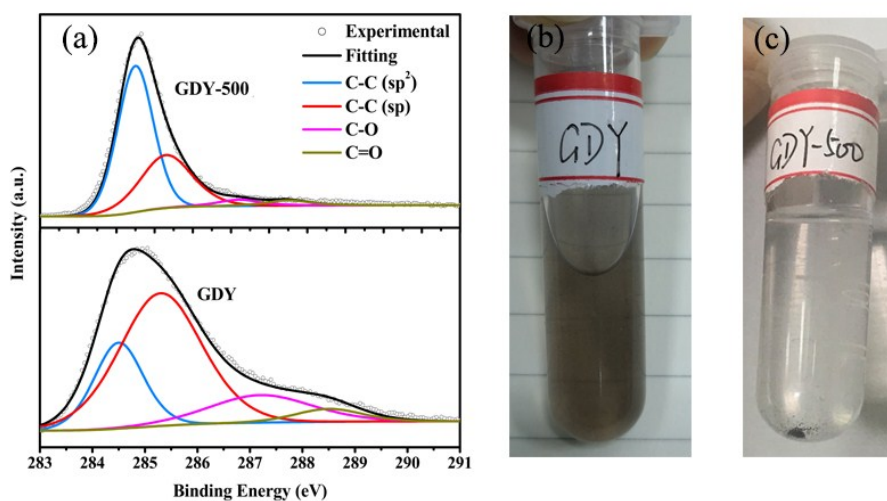

**Figure S2.** (a) The high resolution XPS spectra of C1s of the prepared GDY and the

annealed sample GDY-500, which is reduced at 500 °C. It is seen that the prepared GDY contains hydrophilic oxygen-containing functional groups (C-O and C=O), and the GDY sample is greatly reduced when it is annealed at 500 °C. (b) & (c) are the photos of the dispersions of GDY and GDY-500, respectively. It is clearly seen that the prepared GDY has good solubility in ethanol. For comparison, GDY-500 was dispersed in ethanol with the same experimental condition, and it is found that the annealed graphdiyne with little oxygen-containing functional groups is difficult to dissolve in ethanol.

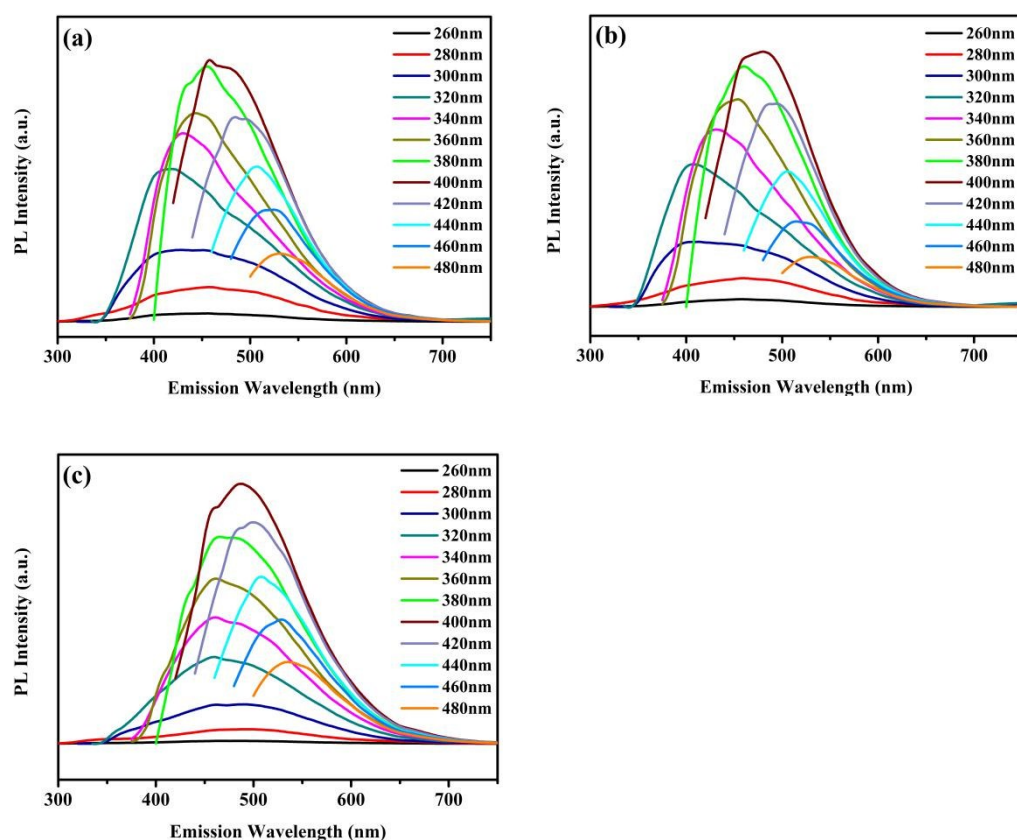

**Figure S3.** The PL spectra at different excitation wavelengths from 260 to 480 nm of (a) GDY, (b) FGDY-1, (c) FGDY-3.

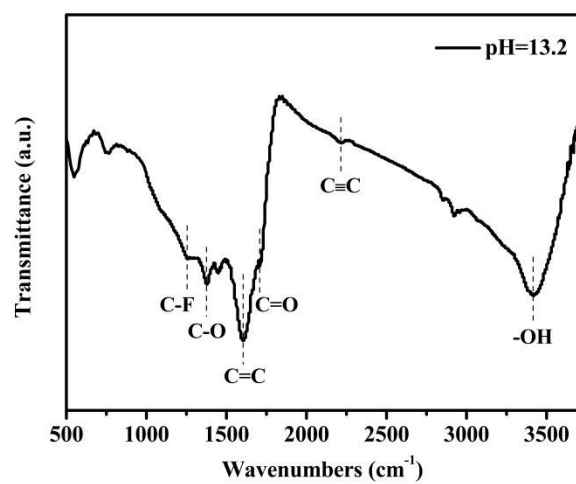

**Figure S4.** Fourier infrared spectrum of FGDY-2 at alkaline conditions.
